# Supplementary material for: A cyclic hexacopper(ii) fluoro complex that encapsulates two fluoride anionsElectronic supplementary information (ESI) available: observed and simulated EPR spectra for 2. See http://www.rsc.org/suppdata/cc/b2/b207923m/
Source: Royal Society of Chemistry journal article supplement (doi:10.1039/b207923m), 2002-11-08
Supplement: b207923m.doc [file b207923m.doc]

# SUPPLEMENTARY INFORMATION

##### A Cyclic Hexacopper(II) Fluoro Complex that Encapsulates Two Fluoride Anions

Xiaoming Liua, Abbie C. McLaughlinb,c, Marcelo P. de Mirandaa, Eric J. L. McInnesd,
Colin A. Kilnera and Malcolm A. Halcrowa,*

aDepartment of Chemistry, University of Leeds, Woodhouse Lane, Leeds, UK LS2 9JT.
E-mail: M.A.Halcrow@chem.leeds.ac.uk

bDepartment of Chemistry, University of Cambridge, Lensfield Road, Cambridge, UK CB2 1EW.

cInterdisciplinary Research Centre in Superconductivity, University of Cambridge, Madingley Road, Cambridge, UK CB3 0HE.

dEPSRC CW EPR Service, Department of Chemistry, University of Manchester, Oxford Road, Manchester, UK M13 9PL.


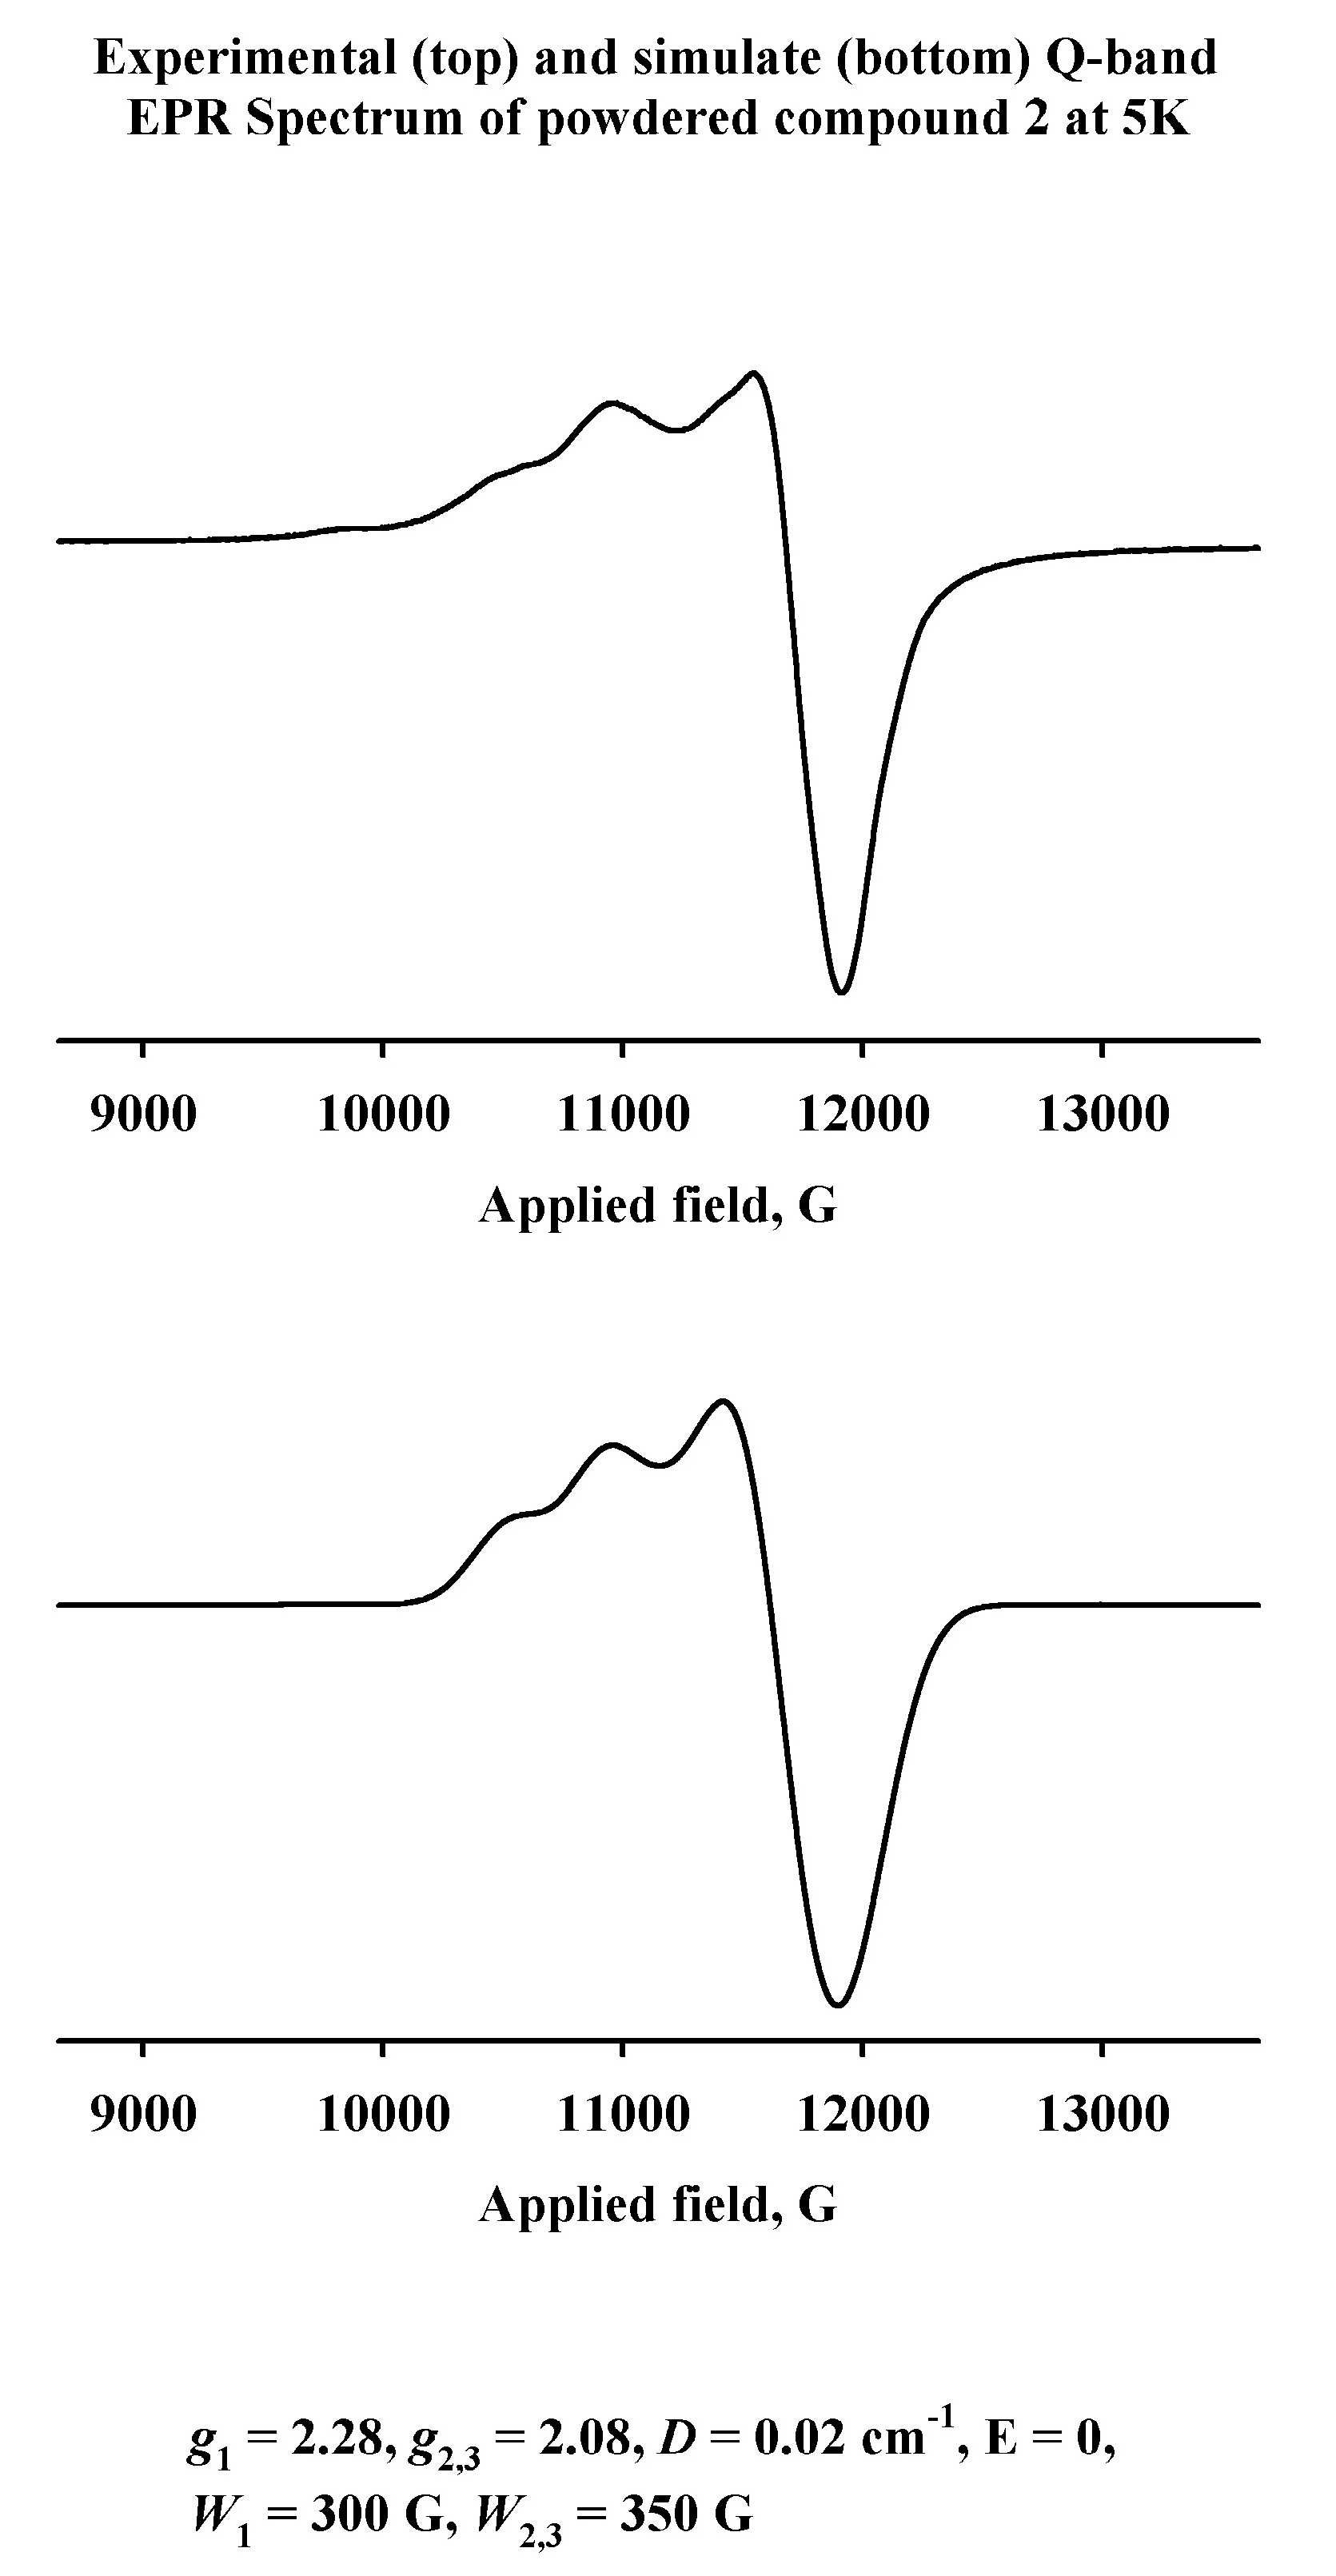


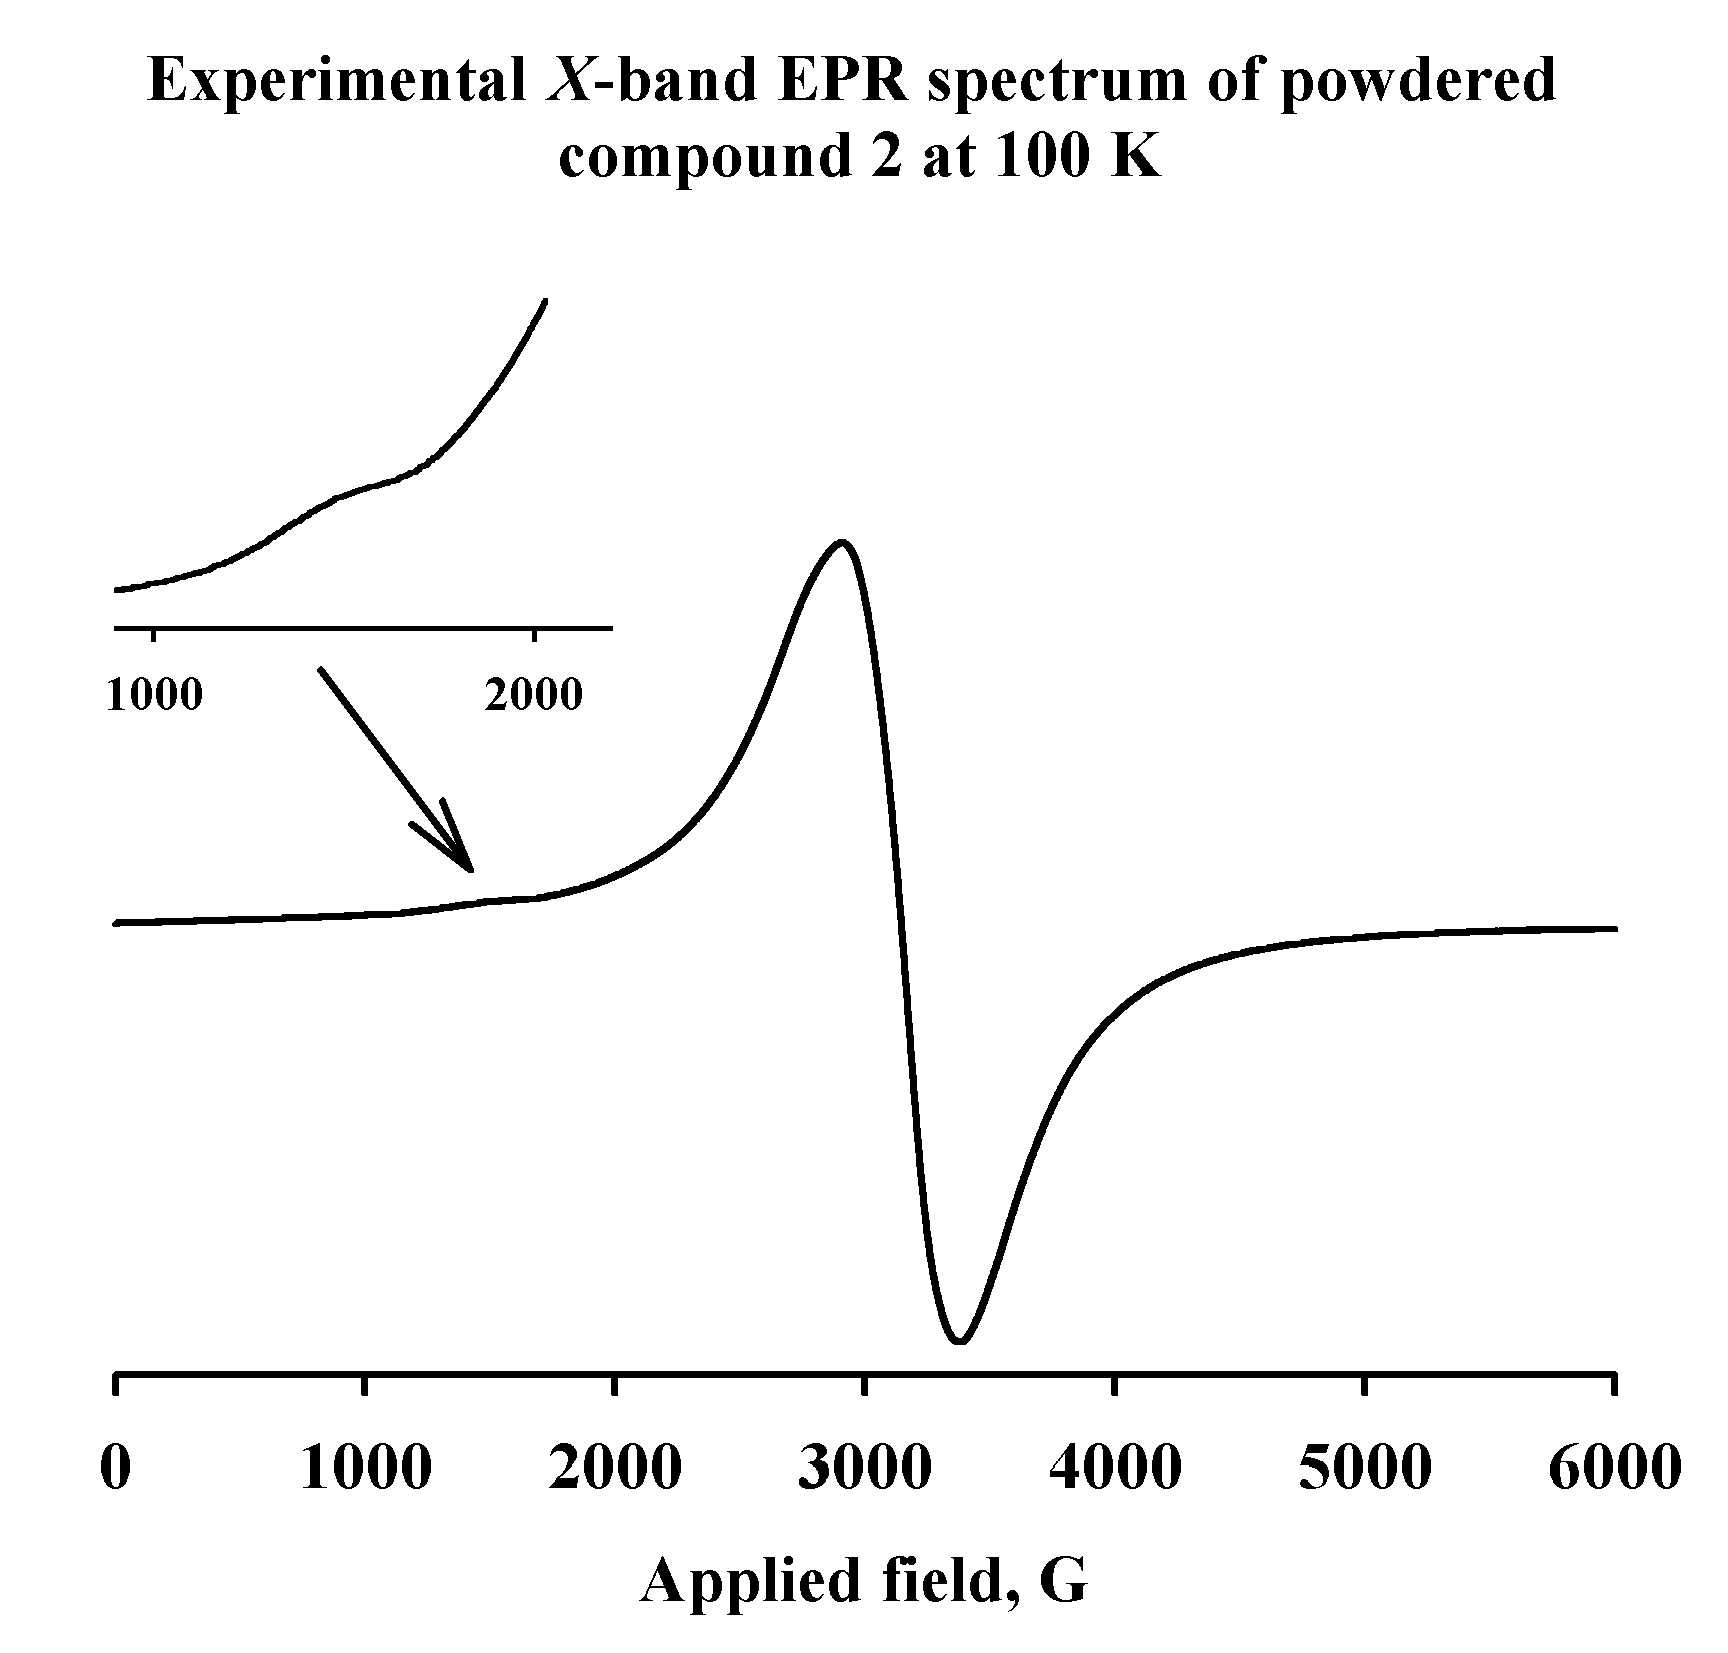


See the main article for more details of the simulation and peak assignments of both these spectra.
